# Supplementary material for: Covalent attachment of 3-(aminomethyl)pyridine to graphene oxide: a new stabilizer for the synthesis of a palladium thin film at the oil–water interface as an effective catalyst for the Suzuki–Miyaura reaction
Source: Royal Society of Chemistry journal article supplement (doi:10.1039/c5ra07171b), 2015-01-01
Supplement: c5ra07171b1.pdf [file c5ra07171b1.pdf]

**Covalent attachment of 3-(aminomethyl)pyridine to graphene oxide: A new stabilizer for the synthesis of palladium thin film at oil–water interface as an effective catalyst for Suzuki–Miyaura reaction**

S. Jafar Hoseini,\* Hedieh Ghanavat Khozestan and Roghayeh Hashemi Fath

Department of Chemistry, Faculty of Sciences, Yasouj University, Yasouj 7591874831, Iran.

**Suzuki–Miyaura Coupling Reaction Product Characterization Data**

The following product was identified by comparison with previously reported spectroscopic data:

Biphenyl (1a).<sup>1</sup> White solid, mp: 66–69 °C (lit. mp 69–71 °C); FT-IR (KBr/cm<sup>-1</sup>): 3058, 3032, 1568, 1479, 1424, 1344, 1168, 1090, 1040, 1005, 725, 696; <sup>1</sup>H NMR (400 MHz, CDCl<sub>3</sub>): δ = 7.46 (m, 2H), 7.55 (m, 4H), 7.71 (m, 4H).

4-Methylbiphenyl (1b).<sup>2</sup> White solid, mp: 43–44 °C (lit. mp 44–47 °C); FT-IR (KBr/cm<sup>-1</sup>): 3060, 2959, 2928, 1600, 1463, 1380, 1273, 1122, 1072, 1039; <sup>1</sup>H NMR (400 MHz, CDCl<sub>3</sub>): δ = 2.45 (s, 3H, CH<sub>3</sub>), δ = 7.33 (m, 2H), 7.37 (m, 1H), 7.5 9 (m, 2H), 7.76 (m, 2H), 7.88 (2H).

4-Methoxybiphenyl (1c).<sup>3</sup> White solid, mp: 84–88 °C (lit. mp 86–90 °C); FT-IR (KBr/cm<sup>-1</sup>): 3066, 3002, 2836, 1890, 1606, 1521, 1482, 1286; <sup>1</sup>H NMR (400 MHz, CDCl<sub>3</sub>): δ = 7.53 (m, 4H), 7.40 (t, 2H), 7.28 (t, 1H), 6.96 (d, 2H), 3.84 (s, 3H).

4-Nitrobiphenyl (1d).<sup>4</sup> Yellow solid, mp: 111–113 °C (lit. mp 113–115 °C); FT-IR (KBr/cm<sup>-1</sup>): 3053, 2922, 1602, 1522, 1476, 1446, 1341, 1307, 1087, 1012, 846, 743; <sup>1</sup>H NMR (400 MHz, CDCl<sub>3</sub>): δ = 7.47 (m, 3H), 7.67 (m, 2H), 7.77 (m, 2H), 8.46 (m, 2H).

4-Phenylbenzotrile (1e).<sup>5</sup> White solid, mp: 84–86 °C (lit. mp 84–88 °C); FT-IR (KBr/cm<sup>-1</sup>): 3076, 3023, 2930, 2924, 2250, 1660, 1493, 1441, 1179, 1024, 845, 700; <sup>1</sup>H NMR (400 MHz, CDCl<sub>3</sub>): δ= 7.53 (m, 3H), 7.63 (m, 2H), 7.83 (m, 2H), 8.23 (m, 2H).

---

\* Corresponding author: E-mail: jhoseini@yu.ac.ir , sjhoseini54@yahoo.com , Fax: +98 7433342172; Tel: +98 7432223048.

2-Phenylpyridine (1f).<sup>4</sup> Colorless oil, FT-IR (KBr/cm<sup>-1</sup>): 3061, 3033, 1740, 1586, 1476, 1449, 1260, 1151, 1094, 1020, 799, 745, 687; <sup>1</sup>H NMR (400 MHz, CDCl<sub>3</sub>): δ= 6.89 (m, 1H), 7.28 (m, 1H), 7.32 (m, 2H), 7.37 (m, 1H), 7.45 (m, 1H), 7.96 (m, 2H), 8.56 (m, 1H).

## References

- 1 N. S. Nandurkar and B. M. Bhange, *Tetrahedron*, 2008, **64**, 3655.
- 2 D. W. Old, J. P. Wolfe and S. L. Buchwald, *J. Am. Chem. Soc.*, 1998, **120**, 9722.
- 3 H. Mizuno, H. Sakurai, T. Amaya and T. Hirao, *Chem. Commun.*, 2006, 5042.
- 4 C. Desmarets, R. Omar-Amrani, A. Walcarius, J. Lambert, B. Champagne, Y. Fort and R. Schneider, *Tetrahedron*, 2008, **64**, 372.
- 5 O. Grossman and D. Gelman, *Org. Lett.*, 2006, **8**, 1189.
